# Supplementary material for: An 18 kDa TSPO specific ligand-based polymeric nanoformulation: synthesis, computational and biological studies
Source: Royal Society of Chemistry journal article supplement (doi:10.1039/d4nj00463a), 2024-01-01
Supplement: d4nj00463a1.pdf [file d4nj00463a1.pdf]

# Supplementary Data

**Characterization of *N*-methyl-2-(5-nitro-2-oxobenzo[*d*]oxazol-3(2*H*)-yl)-*N*-phenylacetamide (5)**

**Physical state and yield:** Yellow solid (68%)

**R<sub>f</sub>:** 0.3 (25% EtOAc + hexane)

**Melting Point:** 166-167°C

**<sup>1</sup>H NMR (400 MHz, CDCl<sub>3</sub>);** δ 8.14 – 8.08 (1H, m), 7.78 (1H, d, *J* = 2.3 Hz), 7.60 – 7.35 (6H, m), 4.37 (2H, s), 3.34 (3H, s).

**<sup>13</sup>C NMR (101 MHz, CDCl<sub>3</sub>)** δ 164.47, 154.11, 144.60, 141.75, 132.13, 130.71, 129.22, 127.38, 119.44, 110.11, 104.88, 44.15, and 37.91.

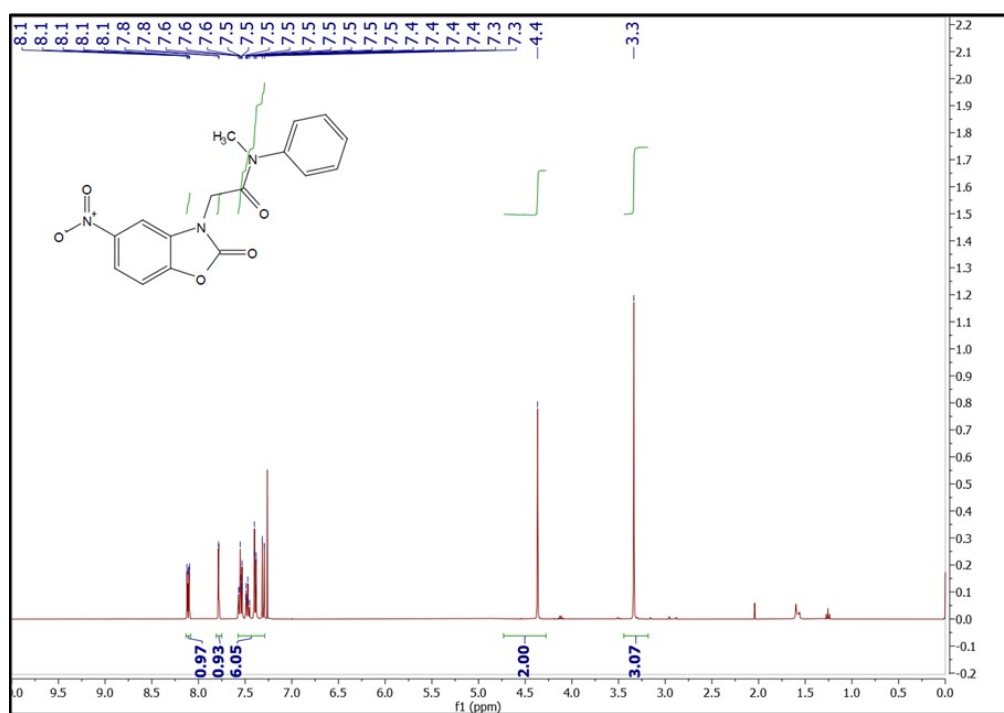

**Fig S1.** <sup>1</sup>H NMR spectrum of compound 5 (500 MHz, CDCl<sub>3</sub>)

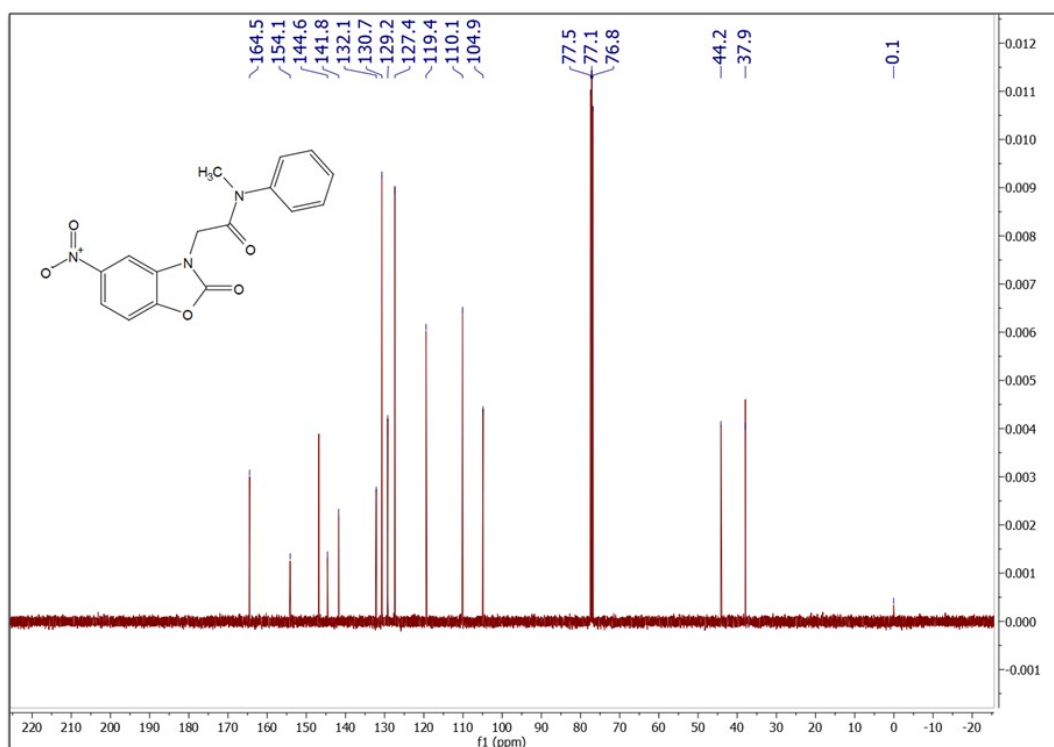

**Fig S2.**  $^{13}\text{C}$  NMR spectrum of compound 5 (101 MHz,  $\text{CDCl}_3$ )

**Characterization of 2-(5-amino-2-oxobenzo[*d*]oxazol-3(2*H*)-yl)-*N*-methyl-*N*-phenylacetamide (6)**

**Physical state and yield:** White solid (72%)

**$R_f$ :** 0.4 (20% EtOAc + hexane)

**Melting Point:** 167-168°C

**$^1\text{H}$  NMR (400 MHz,  $\text{DMSO-}D_6$ ):** 7.54 (6H, d,  $J = 5.55$ ), 6.95 (1H, d,  $J = 8.4$  Hz), 6.29 (2H, m), 5.05 (2H, s), 4.23 (2H, s) and 3.21 (3H, s)

**$^{13}\text{C}$  NMR (101 MHz,  $\text{DMSO-}D_6$ )  $\delta$**  165.56, 155.14, 146.34, 142.59, 133.72, 132.36, 130.65, 128.94, 127.91, 110.23, 107.62, 95.79, 39.44.

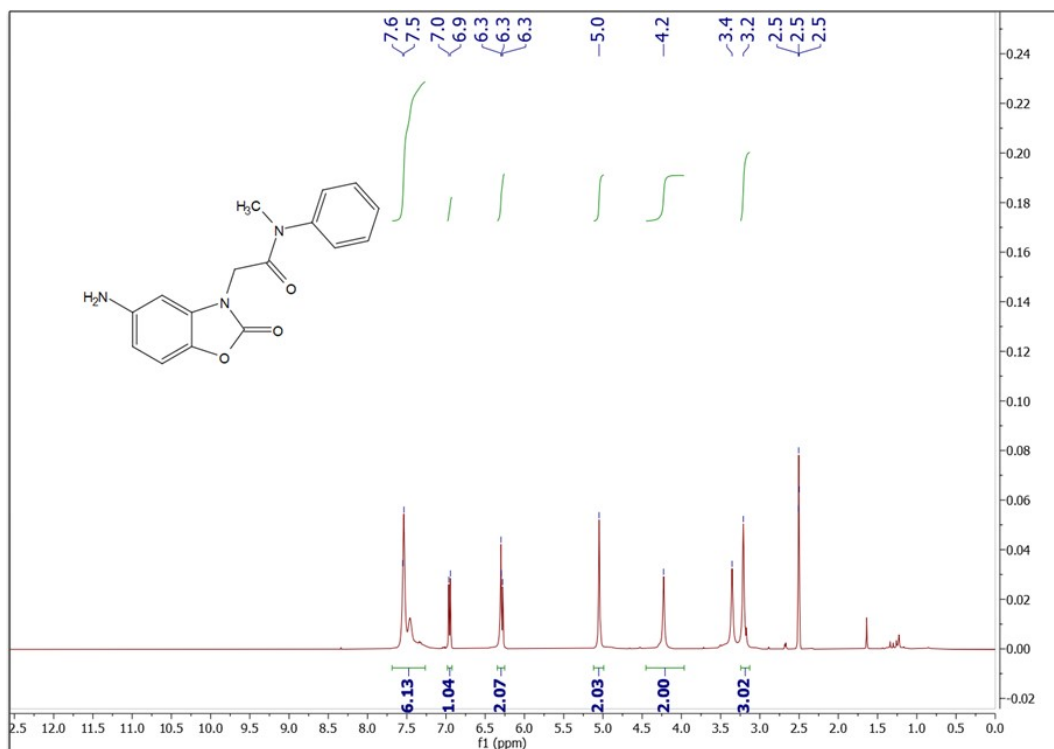

**Fig S3.**  $^1\text{H}$  NMR spectrum of compound 6 (500 MHz,  $\text{DMSO-}d_6$ )

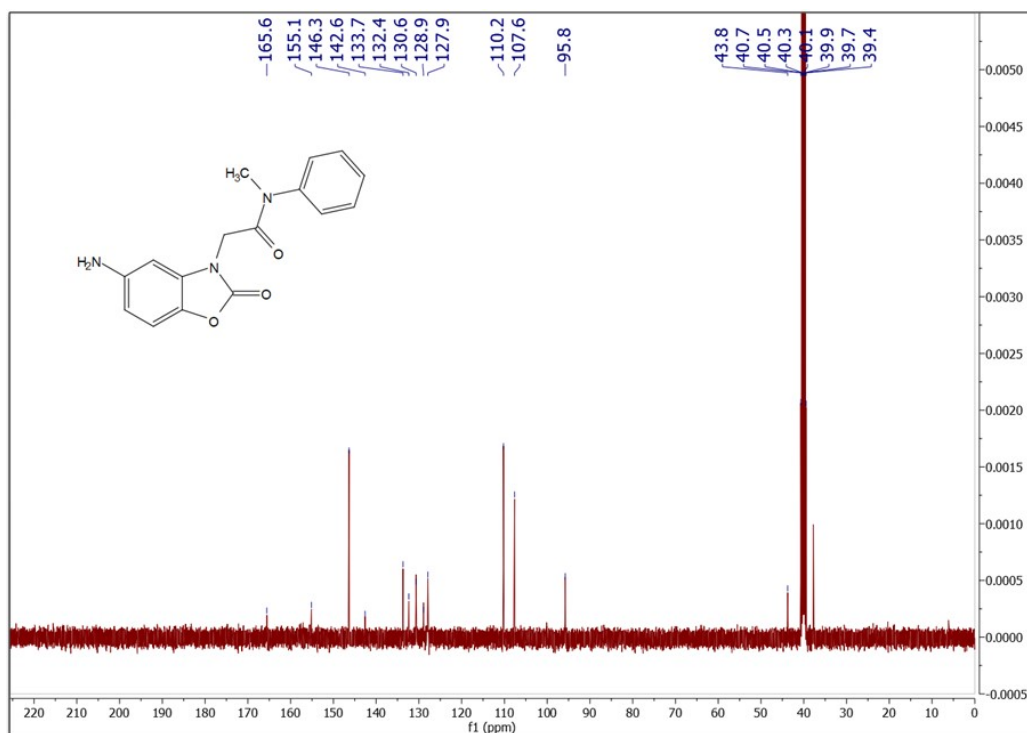

**Fig S4.**  $^{13}\text{C}$  NMR spectrum of compound 6 (101 MHz,  $\text{DMSO-}d_6$ )

**Characterization of (E)-2-(5-(((5,6-dimethoxy-2-oxo-2H-chromen-4-yl)methylene)amino)-2-oxobenzo[d]oxazol-3(2H)-yl)-N-methyl-N-phenylacetamide, MCBP (7)**

**Physical state and yield:** Yellow solid (65%)

**R<sub>f</sub>:** 0.5 (2 % MeOH in CHCl<sub>3</sub>)

**Melting Point:** 270-271°C

**<sup>1</sup>H NMR (500 MHz, DMSO-*D*<sub>6</sub>)** δ 8.91 (1H, s), 8.60 (1H, d, *J* = 9.0 Hz), 7.50 (7H, m), 7.23 (2H, m), 6.86 (1H, s), 4.40 (2H, s), 3.95 (3H, s), 3.85 (3H, s), 3.22 (3H, s).

**<sup>13</sup>C NMR (101 MHz, DMSO-*D*<sub>6</sub>)** δ 165.39, 160.47, 158.27, 155.93, 154.64, 148.50, 146.93, 146.11, 142.42, 141.94, 135.95, 133.01, 130.64, 128.97, 127.98, 122.73, 116.27, 111.64, 110.73, 109.60, 104.22, 61.35, 56.93, 44.26, 37.79.

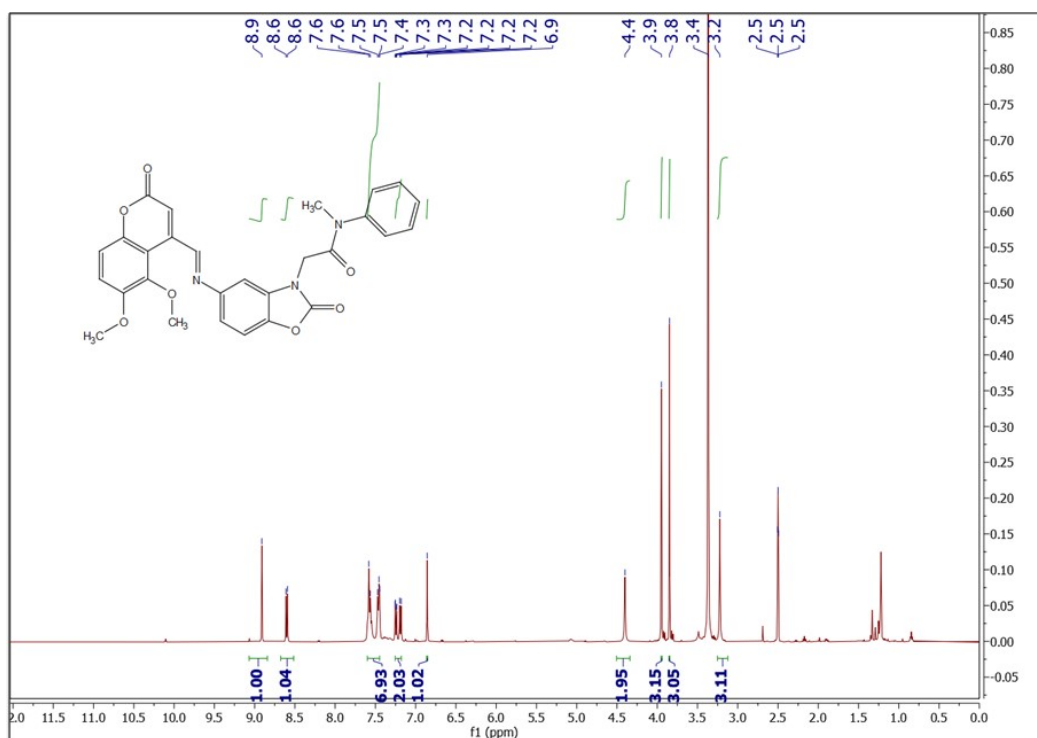

**Fig S5.** <sup>1</sup>H NMR spectrum of MCBP (7) (500 MHz, DMSO-*d*<sub>6</sub>)

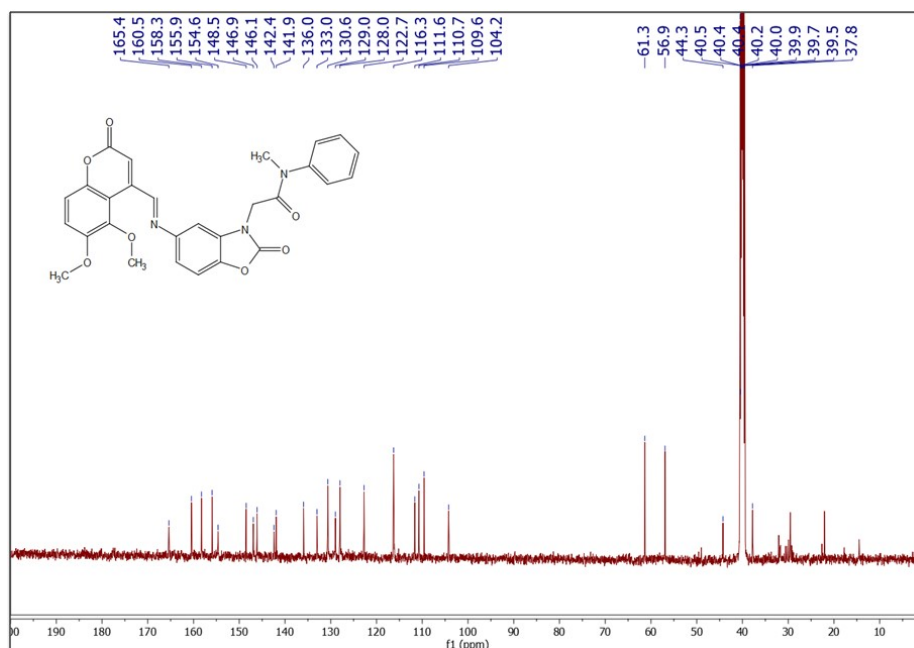

**Fig S6.**  $^{13}\text{C}$  NMR spectrum of MCBP (7) (101 MHz,  $\text{DMSO-}d_6$ )

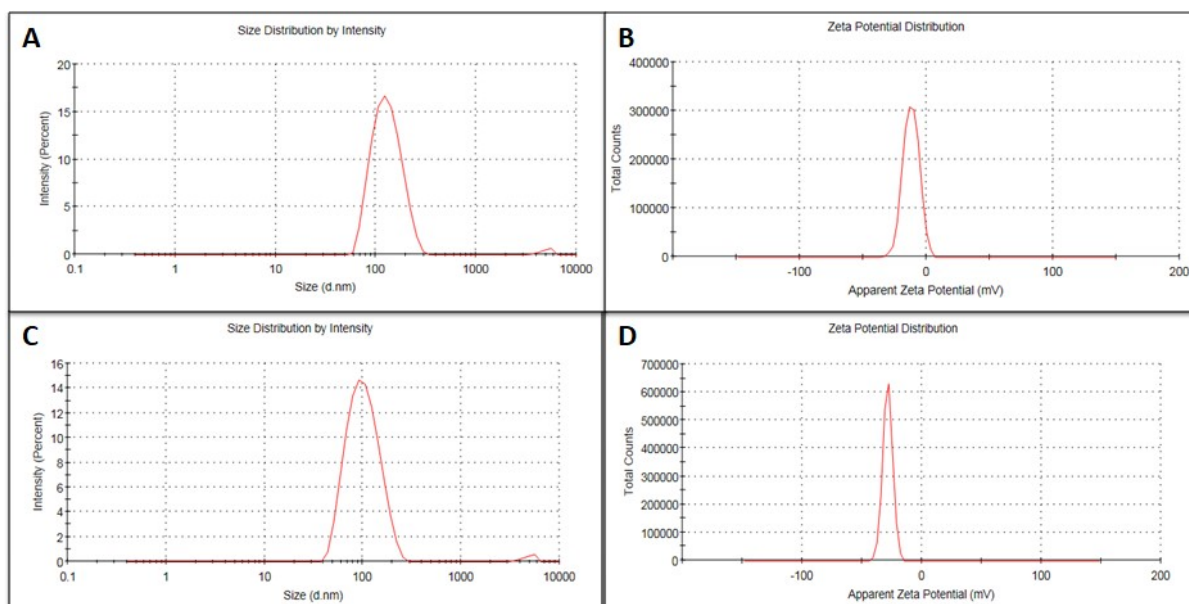

**Fig S7.** (A) and (B) Particle Size and zeta potential plot of Blank PLGA NPs; (C) and (D) Particle Size and zeta potential plot of PK11195-PLGA-NP
